# Supplementary material for: Spruce Balm-Based Semisolid Vehicles for Wound Healing: Effect of Excipients on Rheological Properties and Ex Vivo Skin Permeation
Source: Pharmaceutics. 2023 Jun 8;15(6):1678. doi: 10.3390/pharmaceutics15061678 (PMC10302299; doi:10.3390/pharmaceutics15061678)
Supplement: Supplementary file 1 [file pharmaceutics-15-01678-s001.zip › pharmaceutics-2378154-supplementary.pdf]

## Supplementary Materials:

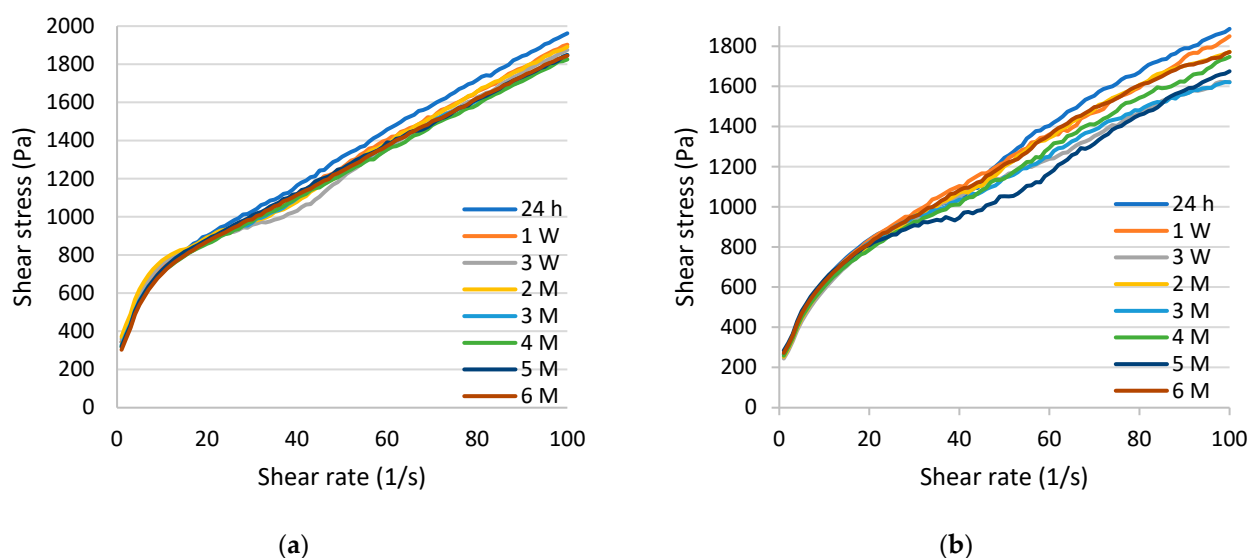

**Figure S1.** Flow curves of (a) wool wax/water stored at room temperature (23°C) and (b) wool wax/water stored in the refrigerator (8°C). The colored curves are means of  $n = 3$  formulations analyzed at room temperature (23°C) at a shear rate of 1-100  $s^{-1}$ . SDs are omitted for better visualization. The refrigerated samples were left to acclimate for six hours at 23°C before each measurement. Abbreviations: h = hour/s, W = week/s, and M = month/s.

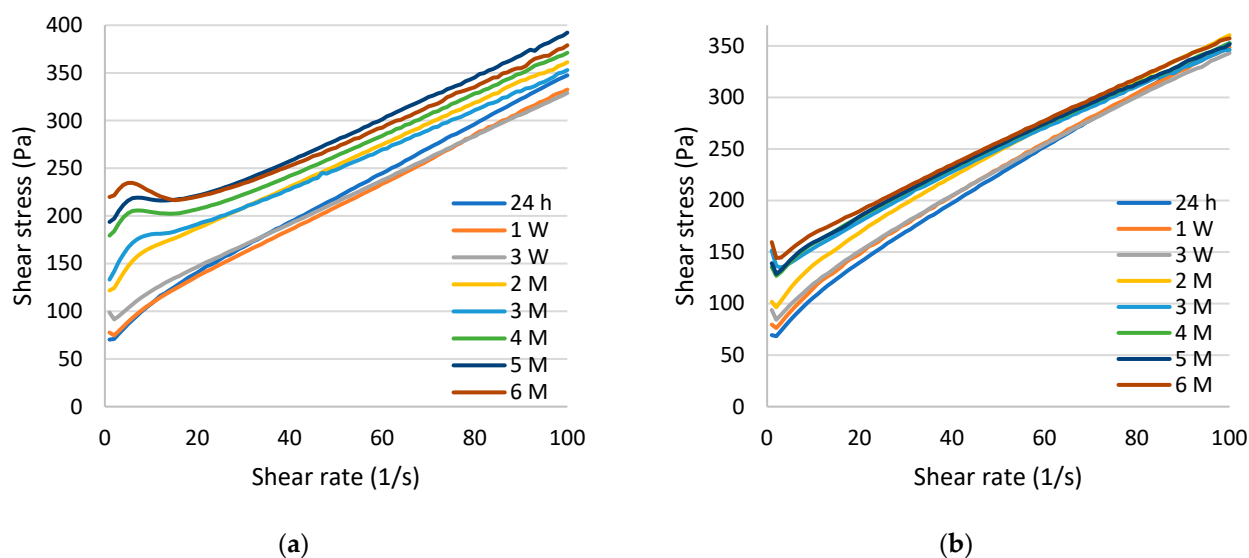

**Figure S2.** Flow curves of (a) Ultrabas/castor oil stored at room temperature (23°C) and (b) Ultrabas/castor oil stored in the refrigerator (8°C). The colored curves are means of  $n = 3$  formulations analyzed at room temperature (23°C) at a shear rate of 1-100  $s^{-1}$ . SDs are omitted for better visualization. The refrigerated samples were left to acclimate for six hours at 23°C before each measurement. Abbreviations: h = hour/s, W = week/s, and M = month/s.

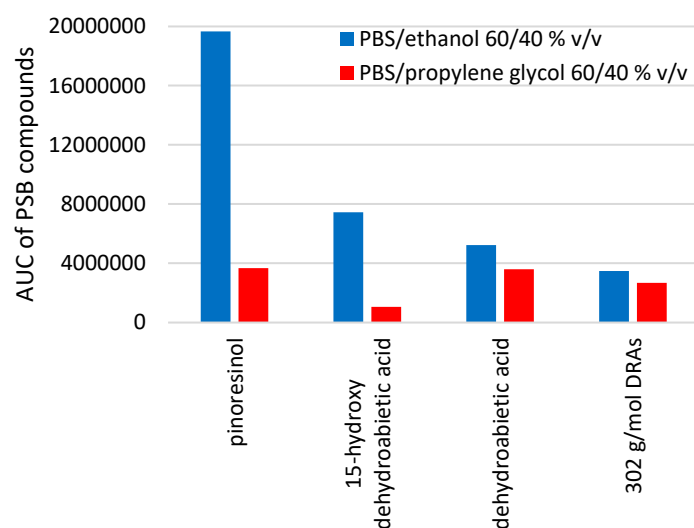

**Figure S3.** Comparison of the relative solubility of PSB compounds in different acceptor media. AUCs were obtained after dissolving an identical surplus amount of purified spruce balm (PSB) in either phosphate-buffered saline/ethanol at 60:40% *v/v* (blue bars) or phosphate-buffered saline/propylene glycol at 60:40% *v/v* (red bars).

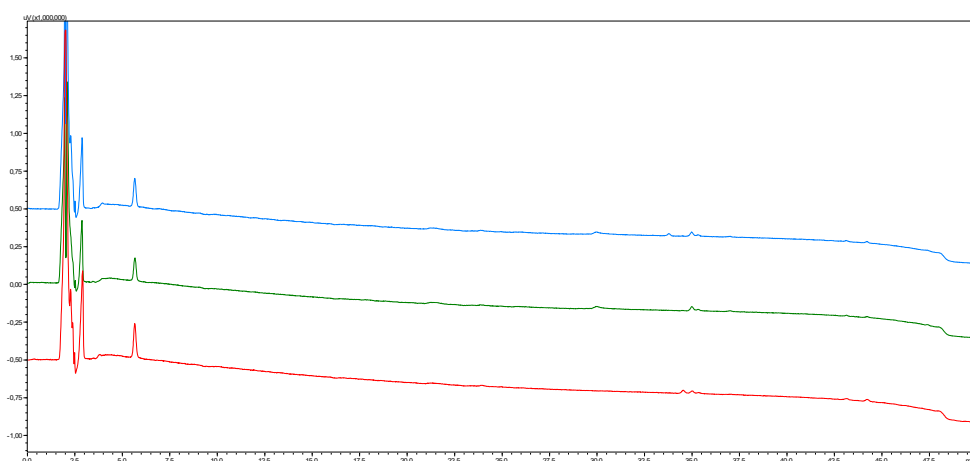

**Figure S4.** HPLC-DAD chromatograms of samples drawn from permeation experiments after 32 h using no ointment (red), pig fat without PSB (green), and wool wax/castor oil without PSB (blue) at 190 nm.

**Table S1.** Batch numbers (PSB), internal assignment (FP), date of harvest, and harvest location of analyzed PSB batches.

| PSB batch    | Date of harvest | Harvest location                             |
|--------------|-----------------|----------------------------------------------|
| PSB 1 (FP6)  | 07/2016         | Promau Kitzhütte, Hollenstein, Lower Austria |
| PSB 2 (FP12) | 07/2016         | Gaflenz Heiligenstein, Upper Austria         |
| PSB 3 (FP13) | 2015            | Lungau, Salzburg                             |
| PSB 4 (FP21) | 2010-2016       | Austria                                      |
| PSB 5 (FP23) | 07/2021         | Schellgaden, Tamsweg, Lungau, Salzburg       |
